# Supplementary material
Source: PubMed Central journal article supplement (PMC6333901)
Supplement: supp_RA118.004942_139516_2_supp_230594_phrq5t.pdf [file supp_RA118.004942_139516_2_supp_230594_phrq5t.pdf]

**Supplementary Table 1 Differentially expressed genes between oncogene-transformed wild-type and *Per2<sup>tm/m</sup>* cell:**

| Gene symbol      | Genbank accession | Description                                                              | Per2 <sup>tm/m</sup> / wild-type |             |
|------------------|-------------------|--------------------------------------------------------------------------|----------------------------------|-------------|
|                  |                   |                                                                          | Zscore                           | Fold change |
| <i>Aldh3a1</i>   | NM_007436         | aldehyde dehydrogenase family 3, subfamily a 1                           | 7.5645                           | 274.2610    |
| <i>Cdsn</i>      | NM_001008424      | corneodesmosin                                                           | 4.9814                           | 40.4312     |
| <i>Gm4340</i>    | NM_001177535      | predicted gene 4340                                                      | 3.6513                           | 31.2278     |
| <i>Aspg</i>      | NM_001081169      | asparaginase homolog                                                     | 3.5634                           | 28.7460     |
| <i>Itgb7</i>     | NM_013566         | integrin beta 7                                                          | 4.1348                           | 21.5868     |
| <i>Cd34</i>      | NM_133654         | CD34 antigen                                                             | 4.1172                           | 13.2134     |
| <i>Msln</i>      | NM_018857         | mesothelin                                                               | 3.2782                           | 11.4412     |
| <i>Tnfrsf10b</i> | NM_009398         | tumor necrosis factor alpha induced protein 6                            | 2.5066                           | 10.6212     |
| <i>Cbr2</i>      | NM_007621         | carbonyl reductase 2                                                     | 3.2108                           | 7.4749      |
| <i>Rcor2</i>     | NM_054048         | REST corepressor 2                                                       | 2.8099                           | 5.8104      |
| <i>Csf1</i>      | NM_007778         | colony stimulating factor 1                                              | -2.5591                          | 0.1990      |
| <i>Crip1</i>     | NM_007763         | cysteine-rich protein 1                                                  | -2.3428                          | 0.1775      |
| <i>Dysf</i>      | NM_001077694      | dysferlin                                                                | -2.4008                          | 0.1700      |
| <i>Fat1</i>      | NM_001081286      | FAT tumor suppressor homolog 1                                           | -2.4761                          | 0.1608      |
| <i>Ak1</i>       | NM_001198790      | adenylate kinase 1                                                       | -2.9735                          | 0.1534      |
| <i>Col7a1</i>    | NM_007738         | collagen, type VII, alpha 1                                              | -3.6570                          | 0.0998      |
| <i>Bmp1</i>      | NM_009755         | bone morphogenetic protein 1                                             | -3.1642                          | 0.0965      |
| <i>Inhba</i>     | NM_008380         | inhibin beta-A                                                           | -3.9726                          | 0.0818      |
| <i>Col3a1</i>    | NM_009930         | collagen, type III, alpha 1                                              | -3.6197                          | 0.0689      |
| <i>Tgfb2</i>     | NM_009367         | transforming growth factor, beta 2                                       | -2.9165                          | 0.0642      |
| <i>Hist1h1c</i>  | NM_015786         | histone cluster 1, H1c                                                   | -3.0692                          | 0.0556      |
| <i>Itga11</i>    | NM_176922         | integrin alpha 11                                                        | -4.0155                          | 0.0514      |
| <i>Mfap5</i>     | NM_015776         | microfibrillar associated protein 5                                      | -3.2108                          | 0.0486      |
| <i>Pdgfrl</i>    | NM_026840         | platelet-derived growth factor receptor-like                             | -3.2865                          | 0.0453      |
| <i>Ccdc80</i>    | NM_026439         | coiled-coil domain containing 80                                         | -4.2491                          | 0.0432      |
| <i>Ndn</i>       | NM_010882         | necdin                                                                   | -2.4941                          | 0.0424      |
| <i>Scrn1</i>     | NM_027268         | secernin 1                                                               | -2.6038                          | 0.0369      |
| <i>Mgll</i>      | NM_001166251      | monoglyceride lipase                                                     | -3.5143                          | 0.0365      |
| <i>Sulf1</i>     | NM_172294         | sulfatase 1                                                              | -3.5458                          | 0.0355      |
| <i>Arhgdig</i>   | NM_008113         | Rho GDP dissociation inhibitor (GDI) gamma                               | -2.7291                          | 0.0315      |
| <i>Dhrs3</i>     | NM_011303         | dehydrogenase/reductase member 3                                         | -3.6780                          | 0.0313      |
| <i>Lmo1</i>      | NM_057173         | LIM domain only 1                                                        | -2.0200                          | 0.0307      |
| <i>Gareml</i>    | NM_001167879      | GRB2 associated, regulator of MAPK1-like                                 | -2.0582                          | 0.0288      |
| <i>Trpv2</i>     | NM_011706         | transient receptor potential cation channel, subfamily V, member 2       | -2.8187                          | 0.0282      |
| <i>Mirg</i>      | AK077315          | RIKEN full-length enriched library, clone:5330411G14                     | -2.9384                          | 0.0242      |
| <i>Plxdc2</i>    | NM_026162         | plexin domain containing 2                                               | -3.9600                          | 0.0240      |
| <i>Cck</i>       | NM_031161         | cholecystokinin                                                          | -4.0382                          | 0.0223      |
| <i>Tcn2</i>      | NM_015749         | transcobalamin 2                                                         | -4.0889                          | 0.0213      |
| <i>Pon3</i>      | NM_173006         | paraoxonase 3                                                            | -3.0744                          | 0.0204      |
| <i>Atp1b1</i>    | NM_009721         | ATPase, Na <sup>+</sup> /K <sup>+</sup> transporting, beta 1 polypeptide | -4.1330                          | 0.0204      |
| <i>Klhl13</i>    | NM_026167         | kelch-like 13                                                            | -2.2696                          | 0.0204      |
| <i>Col12a1</i>   | NM_007730         | collagen, type XII, alpha 1                                              | -3.1006                          | 0.0198      |
| <i>Jam2</i>      | NM_023844         | junction adhesion molecule 2                                             | -3.1471                          | 0.0186      |
| <i>Meg3</i>      | NR_027652         | maternally expressed 3                                                   | -4.2305                          | 0.0186      |
| <i>Gas6</i>      | NM_019521         | growth arrest specific 6                                                 | -5.4247                          | 0.0181      |
| <i>Rnf128</i>    | NM_023270         | ring finger protein 128                                                  | -4.3437                          | 0.0167      |
| <i>Lama2</i>     | NM_008481         | laminin, alpha 2                                                         | -3.2429                          | 0.0165      |
| <i>Trp1</i>      | NM_001081156      | TMF1-regulated nuclear protein 1                                         | -3.2448                          | 0.0165      |
| <i>Zdhhc2</i>    | AK046533          | zinc finger, DHHC domain containing 2                                    | -2.4396                          | 0.0154      |
| <i>Lass4</i>     | NM_026058         | LAG1 homolog, ceramide synthase 4                                        | -2.4747                          | 0.0146      |
| <i>Rps4y2</i>    | NR_003634         | ribosomal protein S4, Y-linked 2                                         | -3.3624                          | 0.0142      |
| <i>Vegfc</i>     | NM_009506         | vascular endothelial growth factor C                                     | -3.4172                          | 0.0133      |
| <i>Tll1</i>      | NM_009390         | tolloid-like 1                                                           | -2.6134                          | 0.0116      |
| <i>Postn</i>     | NM_001198766      | periostin, osteoblast specific factor                                    | -4.7663                          | 0.0112      |
| <i>Col4a2</i>    | NM_009932         | collagen, type IV, alpha 2                                               | -4.7746                          | 0.0111      |
| <i>Pcolce2</i>   | NM_029620         | procollagen C-endopeptidase enhancer 2                                   | -2.6663                          | 0.0106      |
| <i>Cd59a</i>     | NM_007652         | CD59a antigen                                                            | -3.6658                          | 0.0097      |
| <i>Adam23</i>    | NM_011780         | a disintegrin and metalloproteinase domain 23                            | -2.7587                          | 0.0091      |
| <i>Pbxip1</i>    | NM_146131         | pre B cell leukemia transcription factor interacting protein 1           | -5.0180                          | 0.0089      |
| <i>Megf10</i>    | NM_001001979      | multiple EGF-like-domains 10                                             | -2.9642                          | 0.0065      |
| <i>Bmper</i>     | NM_028472         | BMP-binding endothelial regulator                                        | -4.0287                          | 0.0061      |
| <i>Rgs4</i>      | NM_009062         | regulator of G-protein signaling 4                                       | -4.0299                          | 0.0061      |
| <i>Tspan18</i>   | NM_183180         | tetraspanin 18                                                           | -3.0360                          | 0.0058      |
| <i>Npy1r</i>     | NM_010934         | neuropeptide Y receptor Y1                                               | -3.0405                          | 0.0058      |
| <i>Ptprz1</i>    | NM_001081306      | protein tyrosine phosphatase, receptor type Z, polypeptide 1             | -3.0886                          | 0.0053      |
| <i>Col4a1</i>    | NM_009931         | collagen, type IV, alpha 1                                               | -5.5730                          | 0.0053      |
| <i>Slco4a1</i>   | NM_148933         | solute carrier organic anion transporter family, member 4a1              | -3.1204                          | 0.0050      |
| <i>Serpine1</i>  | NM_008871         | serine (or cysteine) peptidase inhibitor, clade E, member 1              | -8.4811                          | 0.0048      |
| <i>Pmaip1</i>    | NM_021451         | phorbol-12-myristate-13-acetate-induced protein 1                        | -3.1641                          | 0.0047      |
| <i>Loxl2</i>     | NM_033325         | lysyl oxidase-like 2                                                     | -4.4108                          | 0.0038      |
| <i>Thbs1</i>     | NM_011580         | thrombospondin 1                                                         | -7.5756                          | 0.0037      |
| <i>Actg2</i>     | NM_009610         | actin, gamma 2                                                           | -7.6154                          | 0.0036      |
